# Supplementary material for: Murine models of Pneumocystis infection recapitulate human primary immune disorders
Source: JCI journal article supplement (doi:10.1172/jci.insight.91894), 2018-06-20
Supplement: sd1 [file 1]

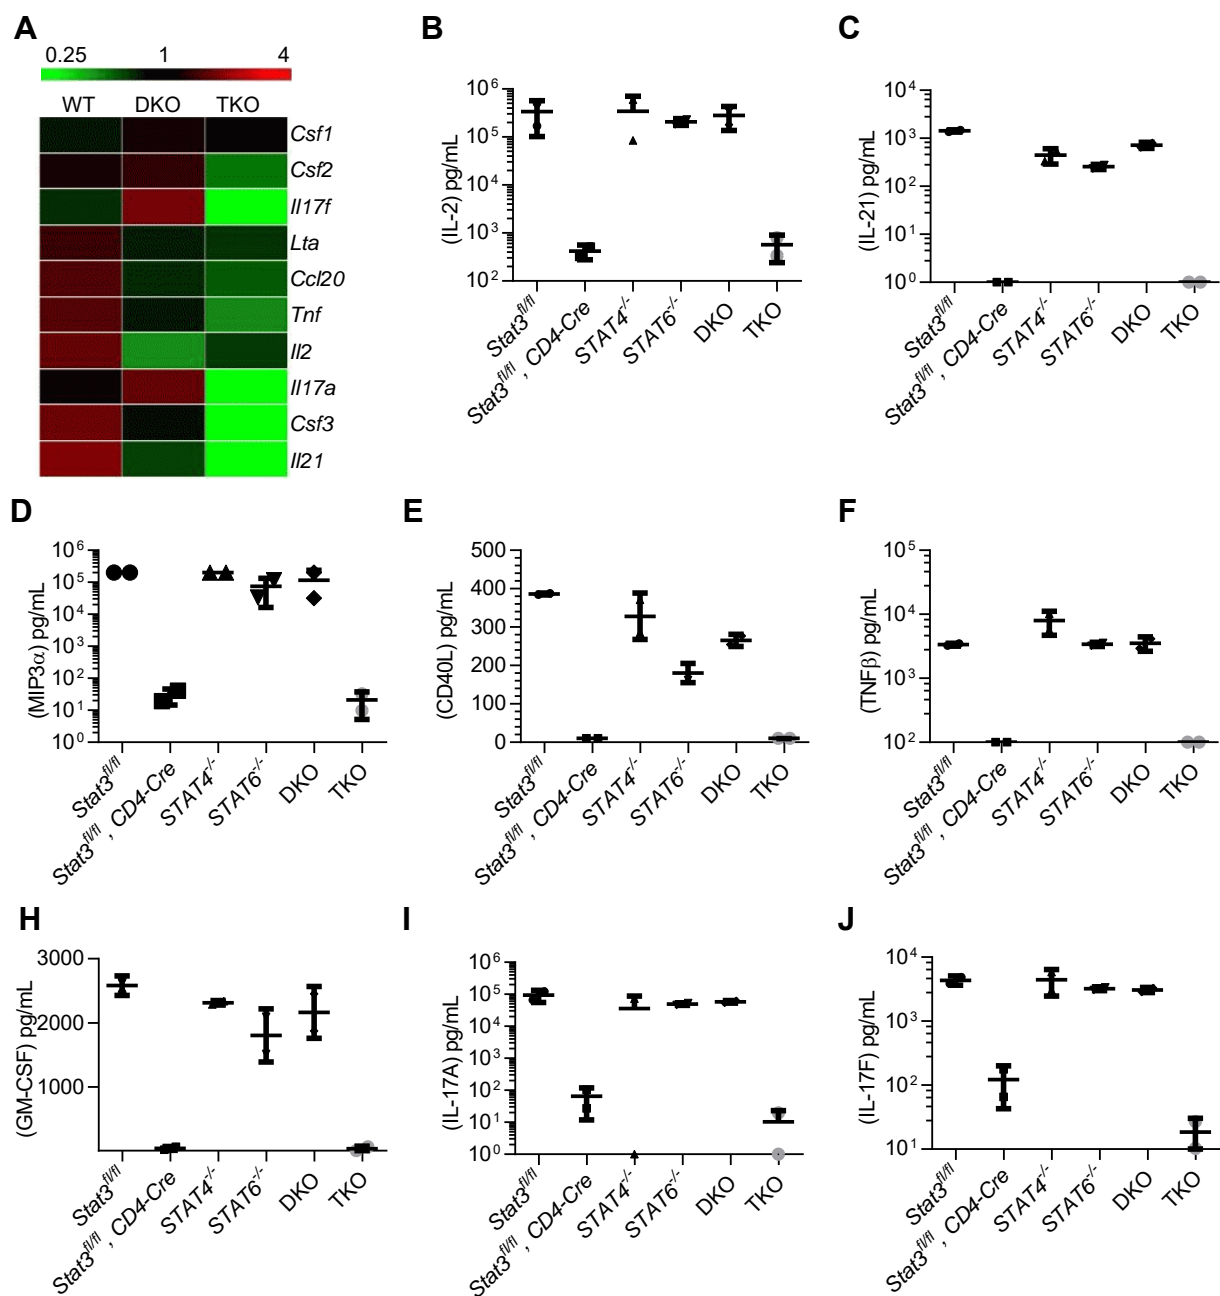

**Supplementary Figure 1. STAT3 signaling is required for intact T-cell responses.** *Rag1*<sup>-/-</sup> mice received WT, *Stat4 Stat6* Double knockout, or *Stat4 Stat6 Stat3* Triple knockout purified splenic CD4<sup>+</sup> T-cells, and infected for 2 weeks with *P. murina*. (A) Whole lung RNA was isolated, sequenced using an Illumina NextSeq 500, and analyzed for differential expression of genes associated with a STAT3 signaling are presented as heat map of the means (N=3). Naïve CD4<sup>+</sup> T-cells were isolated and differentiated into T helper subsets in vitro. (B-J) Cytokine protein concentration in supernatants were measured using a multiplex kit. Values are represented as means  $\pm$  SEM, N=2 per group. These assays were performed once. *P* values are annotated as follows (\*)  $\leq 0.05$ , (\*\*)  $\leq 0.01$ , (\*\*\*)  $\leq 0.001$ , and (\*\*\*\*)  $\leq 0.0001$  (ANOVA).

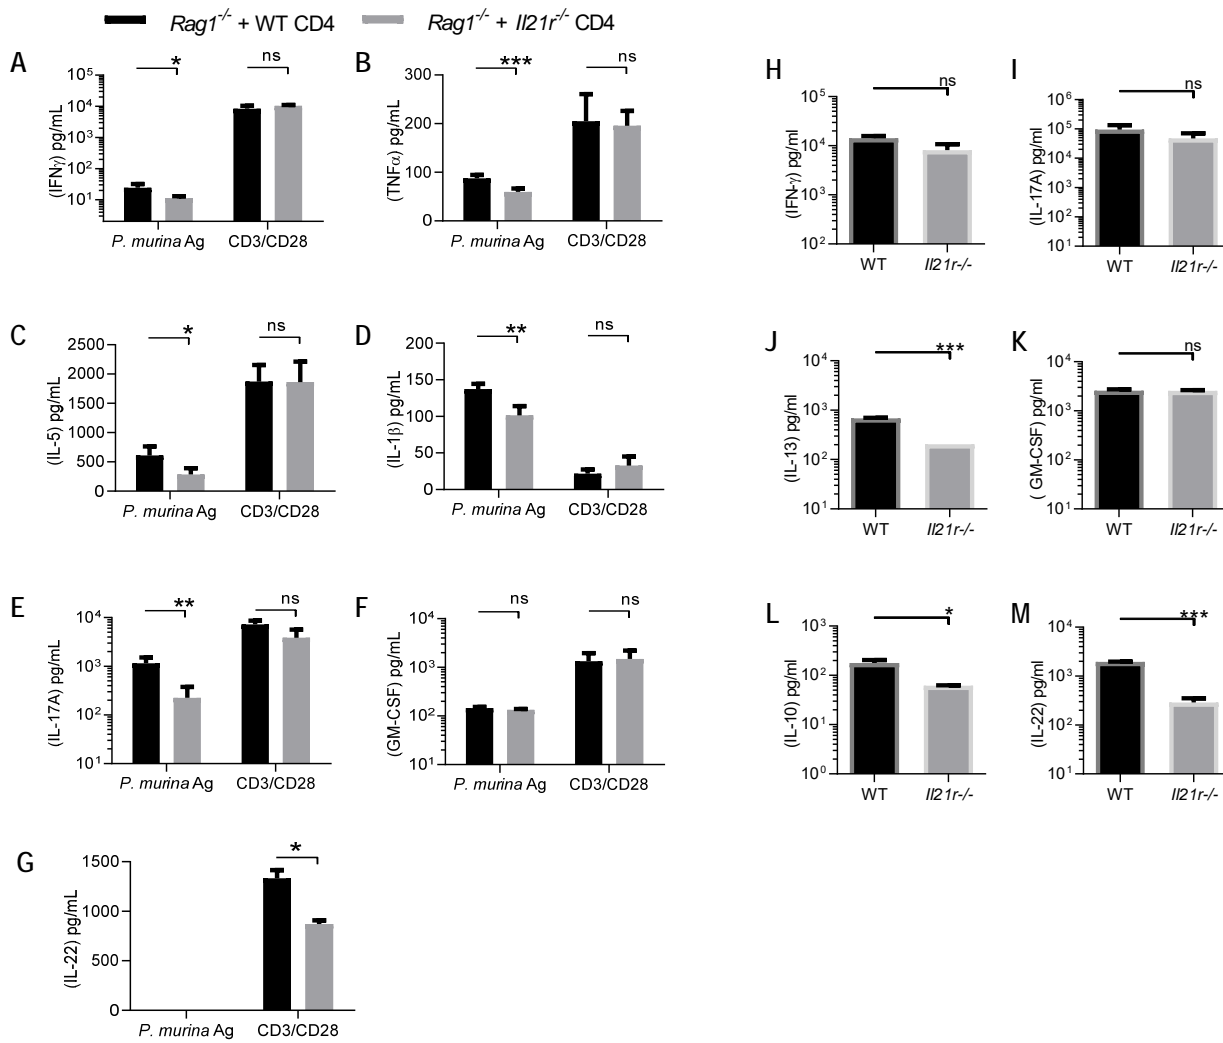

**Supplementary Figure 2. *Il21r*<sup>-/-</sup> CD4<sup>+</sup> T-cells are deficient in IL-22 production.** *Rag1*<sup>-/-</sup> mice received WT or IL-21R deficient purified splenic CD4<sup>+</sup> T-cells, and infected for 2 weeks with *P. murina*. (A-G) Whole lung cell suspensions were stimulated ex vivo with *P. murina* antigen or CD3/CD28 beads (N=3-4). Cytokine protein concentration in supernatants were measured using a multiplex kit or ELISA. Naïve CD4<sup>+</sup> T-cells were isolated from uninfected WT and *Il21r*<sup>-/-</sup> mice and differentiated into T helper subsets in vitro (N=2). (H-L) Cytokine protein concentration in supernatants were measured using a multiplex kit. Values are represented as means  $\pm$  SEM. A-F were performed once. *P* values are annotated as follows (\*)  $\leq 0.05$ , (\*\*)  $\leq 0.01$ , (\*\*\*)  $\leq 0.001$ , and (\*\*\*\*)  $\leq 0.0001$  (ANOVA).

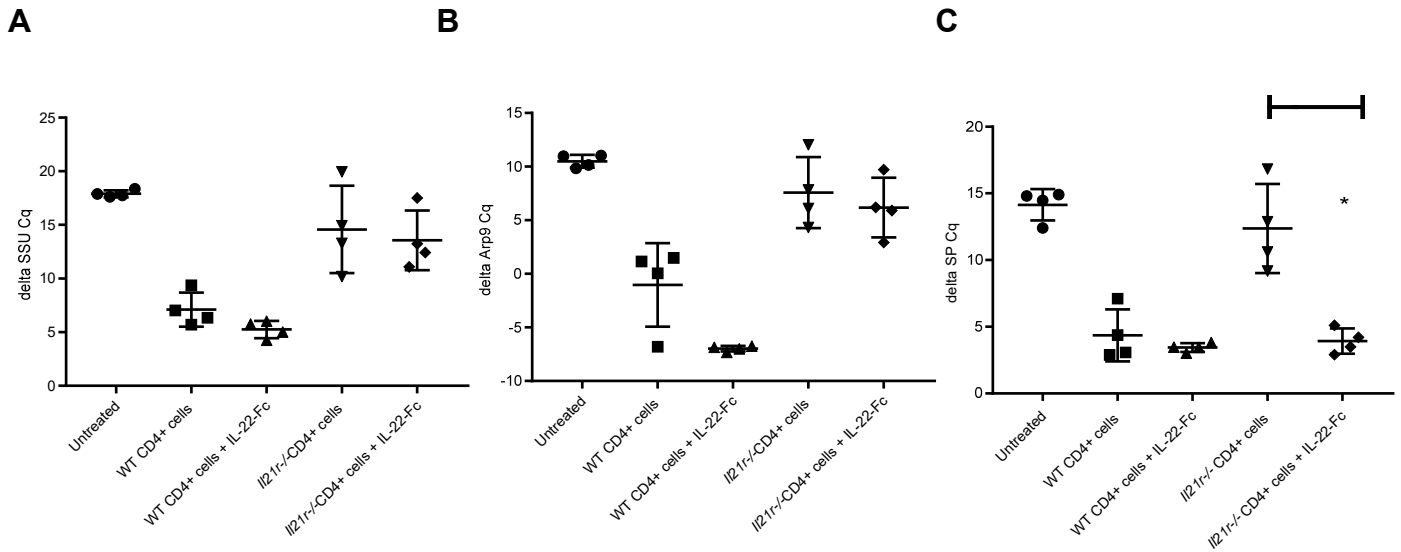

**Supplementary Figure 3. IL-22 reduces troph burden in the adoptive transfer model.** Wildtype (WT) and knockout CD4+ T-cells were adoptively transferred via I.V. injection to *Rag1*<sup>-/-</sup> mice 2 weeks prior to primary infection. Mice were then treated with IL-22-FC as described in Figure 3. Mice were sacrificed two weeks later and RT-PCR of whole lung RNA for (A) *P. murina* small subunit RNA was performed and quantified to assess degree of *Pneumocystis* burden, (B) *Arp9* (ascus) burden (C) *Sp* (troph) burden. *P* values are annotated as follows (\*) ≤0.05, ANOVA, Tukey's multiple comparisons test.

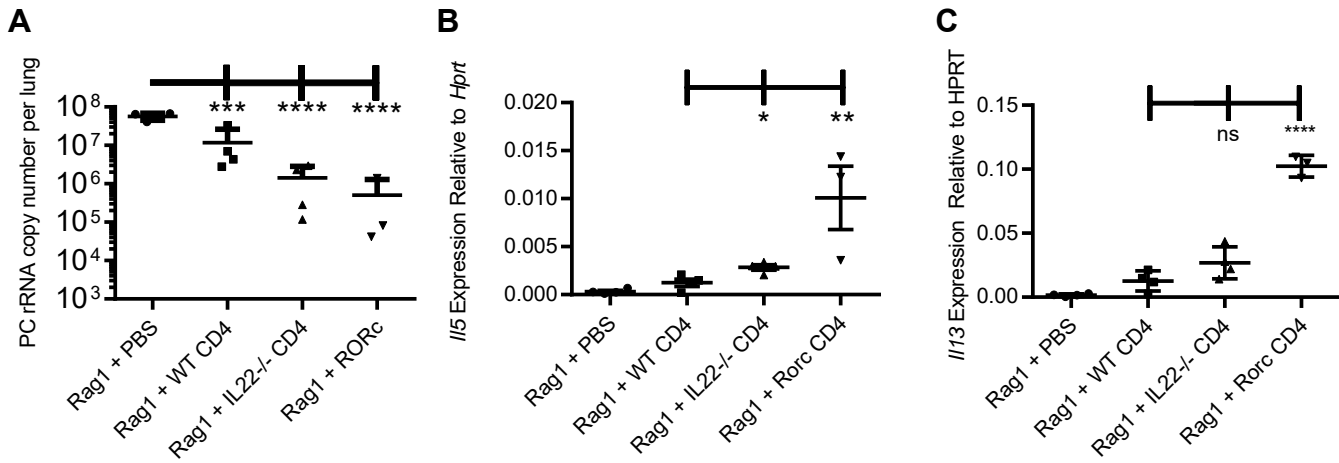

**Supplementary Figure 4. IL-22 is not required for *Pneumocystis* clearance.** Wildtype (WT) and knockout CD4<sup>+</sup> T-cells were adoptively transferred via I.V. injection to *Rag1*<sup>-/-</sup> mice 2 weeks prior to primary infection. RT-PCR of whole lung RNA for (A) *P. murina* mitochondrial ribosomal RNA large subunit was performed and quantified to assess degree of *Pneumocystis* burden, (B) *I/5* and (C) *I/13* expression to assess Th2 responses. Values are reported as means ± SEM for N=4 per group. This experiment was performed once. *P* values are annotated as follows (\*) ≤0.05, (\*\*) ≤0.01, (\*\*\*) ≤0.001, and (\*\*\*\*) ≤0.0001 (ANOVA).

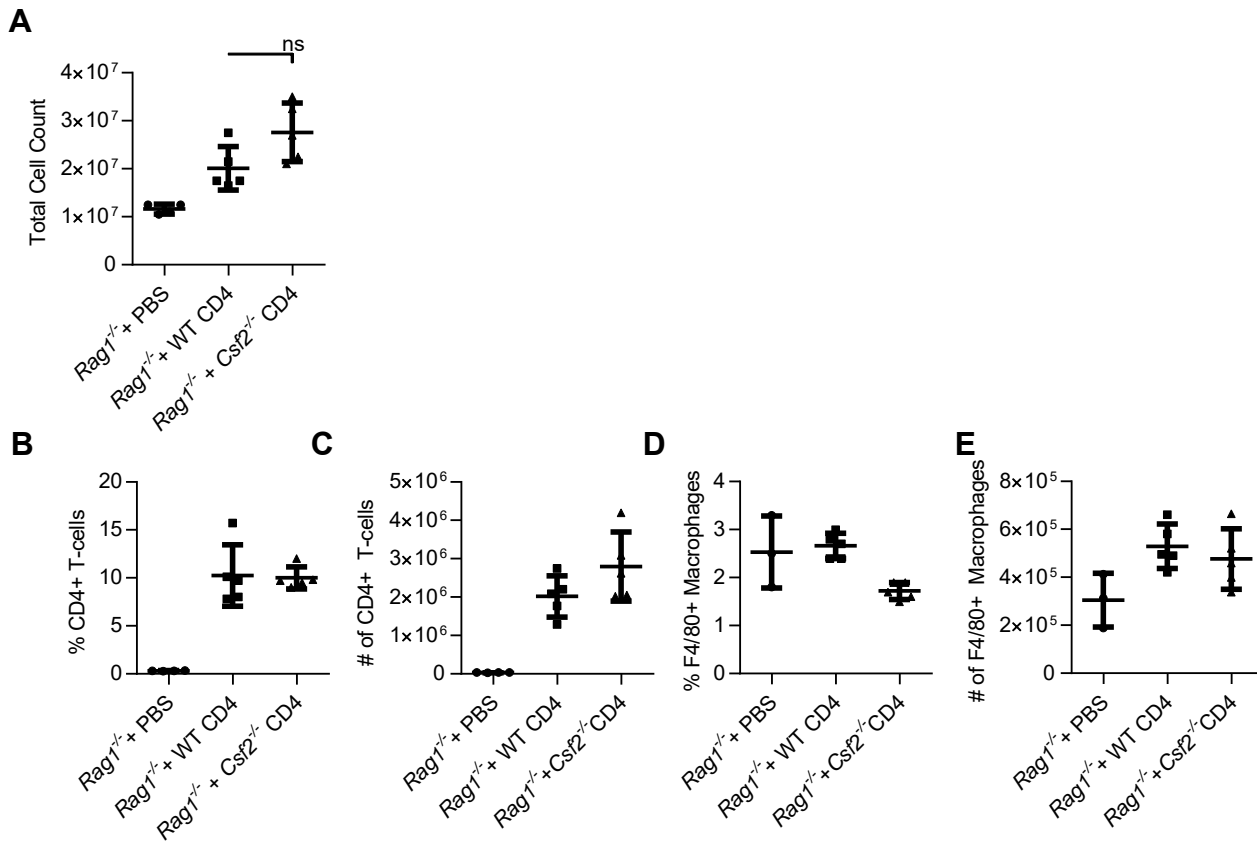

**Supplementary Figure 5. CSF2<sup>-/-</sup> CD4<sup>+</sup> T-cells are proficient in macrophage recruitment.** Wildtype (WT) and *Csf2*<sup>-/-</sup> CD4<sup>+</sup> T-cells were adoptively transferred via I.V. injection to *Rag1*<sup>-/-</sup> mice 2 weeks prior to primary infection. Lungs were digested into a cell suspension, (A) counted, and stained to determine percent (B) and absolute number (C) of CD4<sup>+</sup> T-cells, as well as percent (D) and absolute number (E) of F4/80<sup>+</sup> macrophages. Values are reported as means ± SEM of percent parent gate or calculated absolute numbers (N=4 per group). A-E are representative data of 2 experiments. *P* values are annotated as follows (\*) ≤0.05, (\*\*) ≤0.01, (\*\*\*) ≤0.001, and (\*\*\*\*) ≤0.0001 (ANOVA).
